# Supplementary material for: Does Pelvic Tilt Angle Influence the Isokinetic Strength of the Hip and Knee Flexors and Extensors?
Source: MDPI journal article supplement (doi:10.3390/jfmk9020073), 2024-04-12
Supplement: s1 [file s1]

Table S1: Mean ( $\pm$  standard deviation) maximum hip extension and flexion torques and hip flexion-to-extension (HF/HE) torque ratios at three angular velocities during day 1 (test) and day 2 (retest) measurements which were used to estimate the intraclass correlation coefficients (ICC) for each variable. F-ratios (df = degrees of freedom) and the level of significance (p) indicate whether the estimated ICCs are statistically significant.

|                      | Anterior Pelvic Tilt |                    |                  | Neutral            |                    |                  | Posterior Pelvic Tilt |                    |                  |
|----------------------|----------------------|--------------------|------------------|--------------------|--------------------|------------------|-----------------------|--------------------|------------------|
|                      | Day 1                | Day 2              | F-ratio, df = 12 | Day 1              | Day 2              | F-ratio, df = 12 | Day 1                 | Day 2              | F-ratio, df = 12 |
| Hip extension        |                      |                    |                  |                    |                    |                  |                       |                    |                  |
| 60°·s <sup>-1</sup>  | 247.07 $\pm$ 75.03   | 252.45 $\pm$ 99.02 | 15.84, p< 0.001  | 228.00 $\pm$ 77.32 | 232.36 $\pm$ 86.84 | 13.73, p< 0.001  | 217.72 $\pm$ 82.03    | 222.04 $\pm$ 86.06 | 21.58, p< 0.001  |
| 120°·s <sup>-1</sup> | 196.30 $\pm$ 64.84   | 197.05 $\pm$ 69.33 | 14.78, p< 0.001  | 181.48 $\pm$ 64.94 | 185.67 $\pm$ 80.95 | 25.62, p< 0.001  | 162.96 $\pm$ 88.81    | 164.33 $\pm$ 92.44 | 35.21, p< 0.001  |
| 180°·s <sup>-1</sup> | 148.53 $\pm$ 74.11   | 155.19 $\pm$ 79.10 | 46.71, p< 0.001  | 141.07 $\pm$ 54.11 | 140.89 $\pm$ 59.36 | 14.83, p< 0.001  | 135.10 $\pm$ 79.12    | 134.77 $\pm$ 73.83 | 40.31, p< 0.001  |
| Hip flexion          |                      |                    |                  |                    |                    |                  |                       |                    |                  |
| 60°·s <sup>-1</sup>  | 160.38 $\pm$ 61.91   | 158.28 $\pm$ 58.38 | 15.05, p< 0.001  | 158.68 $\pm$ 57.43 | 158.86 $\pm$ 59.97 | 16.39, p< 0.001  | 160.92 $\pm$ 62.82    | 156.17 $\pm$ 64.45 | 13.21, p< 0.001  |
| 120°·s <sup>-1</sup> | 131.38 $\pm$ 50.35   | 131.59 $\pm$ 48.80 | 29.61, p< 0.001  | 130.53 $\pm$ 47.36 | 131.92 $\pm$ 56.53 | 15.21, p< 0.001  | 132.43 $\pm$ 59.32    | 130.40 $\pm$ 55.54 | 38.83, p< 0.001  |
| 180°·s <sup>-1</sup> | 108.76 $\pm$ 48.97   | 104.31 $\pm$ 49.17 | 32.63, p< 0.001  | 114.38 $\pm$ 48.42 | 110.66 $\pm$ 47.83 | 27.53, p< 0.001  | 113.20 $\pm$ 55.50    | 112.67 $\pm$ 54.48 | 17.45, p< 0.001  |
| HF/HE ratio          |                      |                    |                  |                    |                    |                  |                       |                    |                  |
| 60°·s <sup>-1</sup>  | 64.32 $\pm$ 11.92    | 63.93 $\pm$ 12.04  | 13.93, p< 0.001  | 66.97 $\pm$ 8.94   | 68.68 $\pm$ 8.32   | 10.43, p< 0.01   | 74.16 $\pm$ 12.48     | 71.15 $\pm$ 13.60  | 4.63, p< 0.03    |
| 120°·s <sup>-1</sup> | 67.21 $\pm$ 11.96    | 67.94 $\pm$ 14.38  | 28.27, p< 0.001  | 72.45 $\pm$ 16.36  | 74.72 $\pm$ 22.76  | 21.22, p< 0.001  | 85.92 $\pm$ 17.53     | 86.98 $\pm$ 20.68  | 32.28, p< 0.001  |
| 180°·s <sup>-1</sup> | 76.63 $\pm$ 23.22    | 70.54 $\pm$ 22.34  | 14.07, p< 0.001  | 82.92 $\pm$ 21.43  | 80.39 $\pm$ 18.85  | 24.42, p< 0.001  | 87.79 $\pm$ 13.48     | 86.94 $\pm$ 14.90  | 23.55, p< 0.001  |
