# Supplementary material for: Does Pelvic Tilt Angle Influence the Isokinetic Strength of the Hip and Knee Flexors and Extensors?
Source: MDPI journal article supplement (doi:10.3390/jfmk9020073), 2024-04-12
Supplement: s1 [file s1]

Table S2: Mean ( $\pm$  standard deviation, N = 13) maximum knee extension and flexion torques and knee flexion-to-extension (KF/KE) torque ratios at three angular velocities during day 1 (test) and day 2 (retest) measurements which were used to estimate the intraclass correlation coefficients (ICC) for each variable. F-ratios (df = degrees of freedom) and the level of significance (p) indicate whether the estimated ICCs are statistically significant.

|                      | Anterior Pelvic Tilt |                    |                  | Neutral            |                    |                  | Posterior Pelvic Tilt |                    |                  |
|----------------------|----------------------|--------------------|------------------|--------------------|--------------------|------------------|-----------------------|--------------------|------------------|
|                      | Day 1                | Day 2              | F-ratio, df = 12 | Day 1              | Day 2              | F-ratio, df = 12 | Day 1                 | Day 2              | F-ratio, df = 12 |
| Knee extension       |                      |                    |                  |                    |                    |                  |                       |                    |                  |
| 60°·s <sup>-1</sup>  | 159.61 $\pm$ 44.44   | 162.32 $\pm$ 43.61 | 57.41, p< 0.001  | 161.89 $\pm$ 56.72 | 165.23 $\pm$ 47.56 | 22.93, p< 0.001  | 156.92 $\pm$ 45.13    | 154.84 $\pm$ 36.25 | 39.84, p< 0.001  |
| 120°·s <sup>-1</sup> | 134.23 $\pm$ 57.84   | 133.23 $\pm$ 53.75 | 135.97, p< 0.001 | 133.07 $\pm$ 56.36 | 134.76 $\pm$ 47.01 | 34.13, p< 0.001  | 130.84 $\pm$ 46.24    | 127.76 $\pm$ 37.35 | 34.15, p< 0.001  |
| 180°·s <sup>-1</sup> | 110.53 $\pm$ 50.01   | 110.41 $\pm$ 40.45 | 37.94, p< 0.001  | 111.38 $\pm$ 40.55 | 112.39 $\pm$ 47.02 | 50.96, p< 0.001  | 111.53 $\pm$ 56.13    | 100.31 $\pm$ 41.29 | 6.75, p< 0.02    |
| Knee flexion         |                      |                    |                  |                    |                    |                  |                       |                    |                  |
| 60°·s <sup>-1</sup>  | 77.84 $\pm$ 29.77    | 82.07 $\pm$ 28.86  | 35.31, p< 0.001  | 77.23 $\pm$ 31.27  | 85.15 $\pm$ 28.47  | 30.22, p< 0.001  | 74.46 $\pm$ 29.30     | 80.23 $\pm$ 23.99  | 10.43, p< 0.001  |
| 120°·s <sup>-1</sup> | 59.69 $\pm$ 25.25    | 65.07 $\pm$ 23.83  | 47.65, p< 0.001  | 57.39 $\pm$ 23.29  | 65.00 $\pm$ 18.97  | 22.67, p< 0.001  | 61.46 $\pm$ 18.91     | 63.69 $\pm$ 17.03  | 10.84, p< 0.001  |
| 180°·s <sup>-1</sup> | 50.07 $\pm$ 20.68    | 56.15 $\pm$ 20.33  | 20.31, p< 0.001  | 48.78 $\pm$ 22.49  | 51.69 $\pm$ 21.41  | 18.30, p< 0.001  | 46.07 $\pm$ 21.63     | 45.38 $\pm$ 16.89  | 5.75, p< 0.001   |
| KF/KE ratio          |                      |                    |                  |                    |                    |                  |                       |                    |                  |
| 60°·s <sup>-1</sup>  | 49.32 $\pm$ 12.95    | 51.21 $\pm$ 13.19  | 43.26, p< 0.001  | 48.67 $\pm$ 12.93  | 52.40 $\pm$ 13.73  | 6.91, p< 0.02    | 49.16 $\pm$ 17.38     | 53.61 $\pm$ 16.59  | 10.99, p< 0.001  |
| 120°·s <sup>-1</sup> | 45.99 $\pm$ 15.04    | 53.22 $\pm$ 15.04  | 49.17, p< 0.001  | 44.68 $\pm$ 14.57  | 50.44 $\pm$ 12.32  | 9.65, p< 0.01    | 51.30 $\pm$ 18.72     | 52.88 $\pm$ 16.93  | 23.53, p< 0.001  |
| 180°·s <sup>-1</sup> | 48.69 $\pm$ 13.14    | 53.02 $\pm$ 13.07  | 23.35, p< 0.001  | 43.43 $\pm$ 16.53  | 48.77 $\pm$ 15.52  | 16.15, p< 0.001  | 45.32 $\pm$ 16.36     | 48.53 $\pm$ 18.07  | 5.28, p< 0.03    |
